# Supplementary material for: Label-free fluorescence detection of protein–ligand interactions based on binding-induced enzymatic cleavage protection
Source: Royal Society of Chemistry journal article supplement (doi:10.1039/d0nj03316b), 2020-01-01
Supplement: d0nj03316b1.pdf [file d0nj03316b1.pdf]

## ***Electronic Supplementary Information***

### **Label-free fluorescence detection of protein-ligand interaction based on binding-induced enzymatic cleavage protection**

*Lunxi Duan,<sup>‡a</sup> Hongliang Yao,<sup>‡a</sup> Yong Xie<sup>a</sup> and Ke Pan<sup>\*a</sup>*

<sup>a</sup> Department of General Surgery , the Second Xiangya Hospital, Central South University, Changsha, Hunan, 410008, People's Republic of China

\*To whom correspondence should be addressed: E-mail: panke@csu.edu.cn

<sup>‡</sup>These authors contributed equally to this work.

**Table S1.** Sequences of used oligonucleotides

| Name   | Sequence                                                 | Length |
|--------|----------------------------------------------------------|--------|
| ssDNA  | 5'-TTTTTTTTTTTTTTTTTTTTTTTTTTTTTTTTTTT-3'                | 30 nt  |
| dsDNA  | 5'-TATATATATATATATATATA-3'<br>3'-ATATATATATATATATATAT-5' | 20 bp  |
| hpDNA' | 5'-GATCTACTATGTACAGTTTTCTGTACATAGTAGATC-3'               | 26 nt  |
| hpDNA  | 5'-GATCTACTATGTACAGTTTTCTGTACATAGTAGATC-Biotin           | 36 nt  |

**Table S2.** Comparison of different fluorescent strategy for SA detection

| Detection methods                                    | Detection limit (pM)  | Detection time | Limitations                                                         | Ref. |
|------------------------------------------------------|-----------------------|----------------|---------------------------------------------------------------------|------|
| Quantum dot and ruthenium complex                    | 40 pM<br>(2.11 ng/mL) | 1.2 h          | Synthesis of chemicals and nanomaterials                            | 1    |
| Copper nanoclusters                                  | 100                   | 25 min         | Synthesis of nanomaterial; Low sensitivity                          | 2    |
| MoS <sub>2</sub> nanosheet and Exo III               | 13                    | 2 h            | Synthesis of nanomaterials; Modification with fluorophore           | 3    |
| Catalytic hairpin assembly and DNAzyme               | 2 pM                  | 6.5 h          | Modification with fluorophore and quencher; Time-consuming          | 4    |
| Loop DNA probe and SYBR Green I                      | 400                   | 2 h            | Low sensitivity                                                     | 5    |
| Fluorophore-labeled DNA and graphene oxide           | 80                    | 2 h            | Tedious preparation of nanocomposite; Modification with fluorophore | 6    |
| RCA combined with Exo III-aided signal amplification | 0.8                   | >7 h           | Modification with fluorophore and quencher; Time-consuming          | 7    |
| Exonuclease I and DNAzyme                            | 7                     | 135 min        | Modification with fluorophore and quencher                          | 8    |
| Fluorophore-labeled duplex DNA probe                 | 2930                  | 10 min         | Modification with Fluorophore; Low sensitivity                      | 9    |
| dsDNA-lighted                                        | 450                   | 30 min         | Tedious preparation of                                              | 10   |

| fluorophore                 |                  | fluorescent molecule |   |              |
|-----------------------------|------------------|----------------------|---|--------------|
| SYBR Green I and<br>Exo III | ~19<br>(1 ng/mL) | 20 min               | / | This<br>work |

## References

1. C. Chen, X. Xiang, Y. Liu, G. Zhou, X. Ji and Z. He, *Biosens. Bioelectron.*, 2014, 58, 205-208.
2. H. Wang, H. Zhang, Y. Chen and Y. Liu, *Biosens. Bioelectron.*, 2015, 74, 581-586.
3. X. Xiang, J. Shi, F. Huang, M. Zheng, Q. Deng and J. Xu, *Biosens. Bioelectron.*, 2015, 74, 227-232.
4. S. Liu, C. Cheng, H. Gong and L. Wang, *Chem. Commun.*, 2015, 51, 7364-7367.
5. X. Chen, C. Lin, Y. Chen, F. Luo, Y. Wang and X. Chen, *Biosens. Bioelectron.*, 2016, 83, 97-101.
6. Y. He and B. Jiao, *Talanta*, 2017, 163, 140-145.
7. L. Ou, H. Wang and X. Chu, *Analyst*, 2013, 138, 7218-7223.
8. J. Ming, T. Jiang, Y. Wang and Z. Lv, *Sens. Actuators B: Chem.*, 2017, 252, 450-457.
9. H. Kim, C.Y. Lee, J. Song, J. Yoon, K.S. Park and H.G. Park, *RSC Adv.*, 2018, 8, 39913-39917.
10. Z. Qing, L. Zhu, L.Hou, Z. Zou, S. Yang, R. Yang, *Sci. China Chem.*, 2018, 61, 1630-1636.

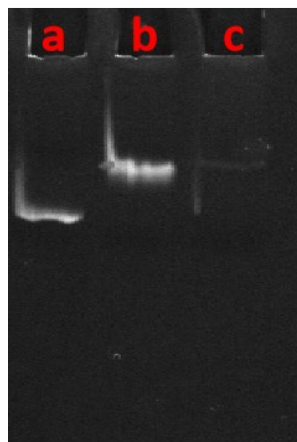

**Fig. S1** Electrophoresis characterization of binding-induced enzymatic cleavage protection. lane a: hpDNA; lane b: hpDNA + SA + Exo III; lane c, hpDNA + Exo III. The final concentration of Exo III, SA, hpDNA, was 1 unit  $\mu\text{L}^{-1}$ , 10  $\mu\text{g mL}^{-1}$ , 200 nM, respectively.

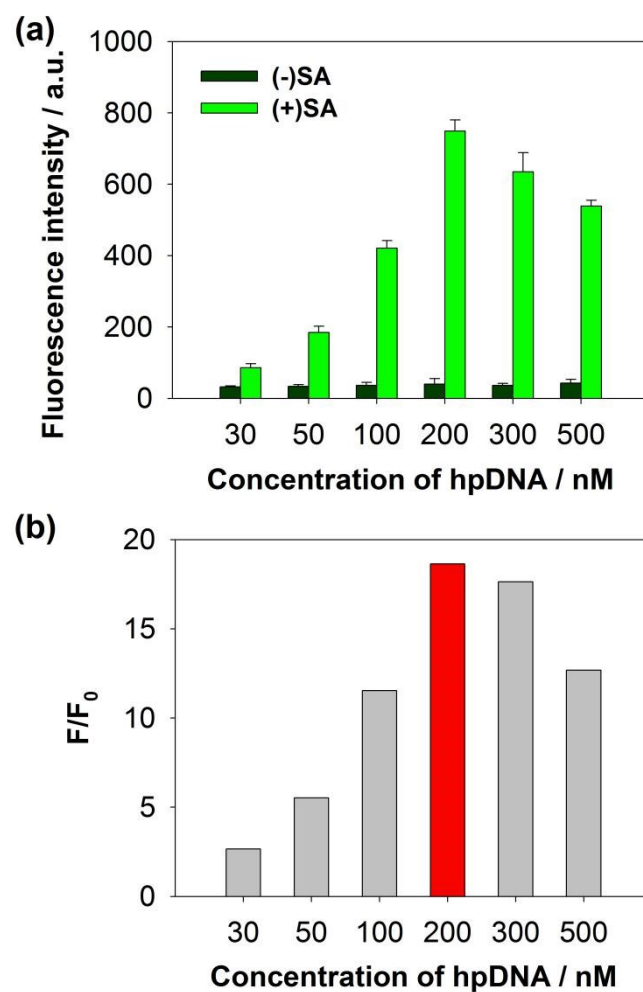

**Fig. S2** (a) Fluorescence intensity of the detection system under different hpDNA concentration. (b) The effect of hpDNA concentration on the detection performance by the manner of signal-to-background ( $F/F_0$ ), where  $F$  is the fluorescence intensity of the detection system in the presence of SA and  $F_0$  is that in the absence of SA.

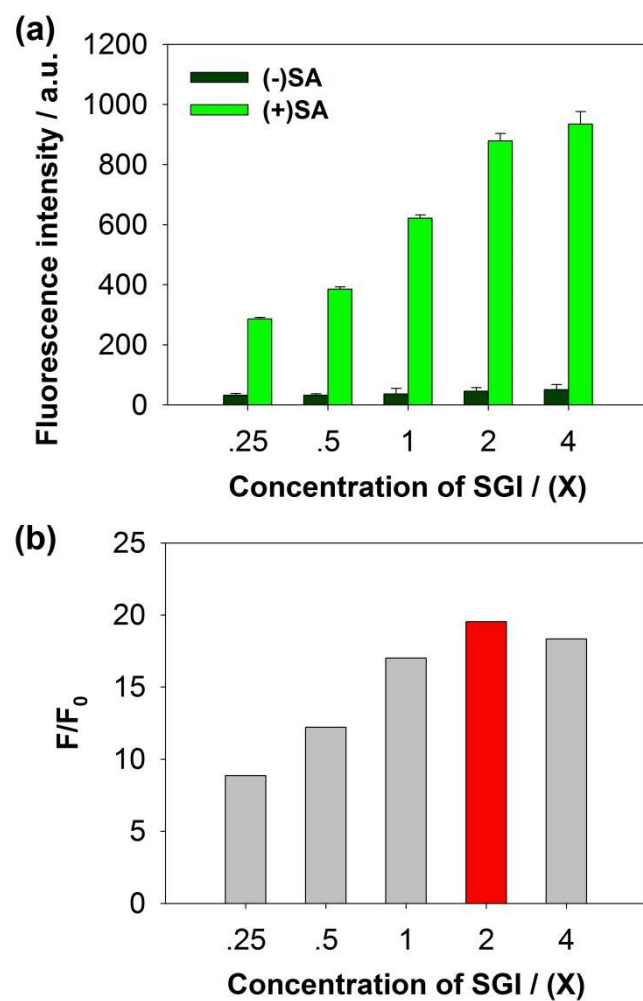

**Fig. S3** (a) Fluorescence intensity of the detection system under different SGI concentration in the absence of SA ( $F_0$ ) or in the presence of SA ( $F$ ). (b) The effect of SGI concentration on the detection performance by the manner of signal-to-background ( $F/F_0$ ).

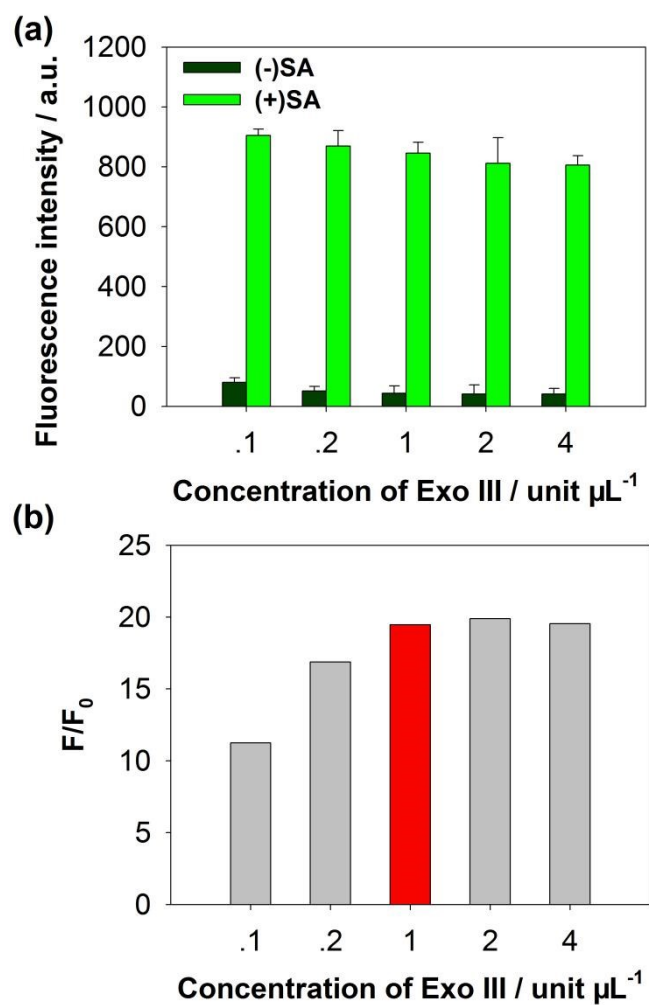

**Fig. S4** (a) Fluorescence intensity of the detection system under different Exo III amount. (b) The effect of Exo III concentration on the detection performance by the manner of signal-to-background ( $F/F_0$ ), where  $F$  is the fluorescence intensity of the detection system in the presence of SA and  $F_0$  is that in the absence of SA.



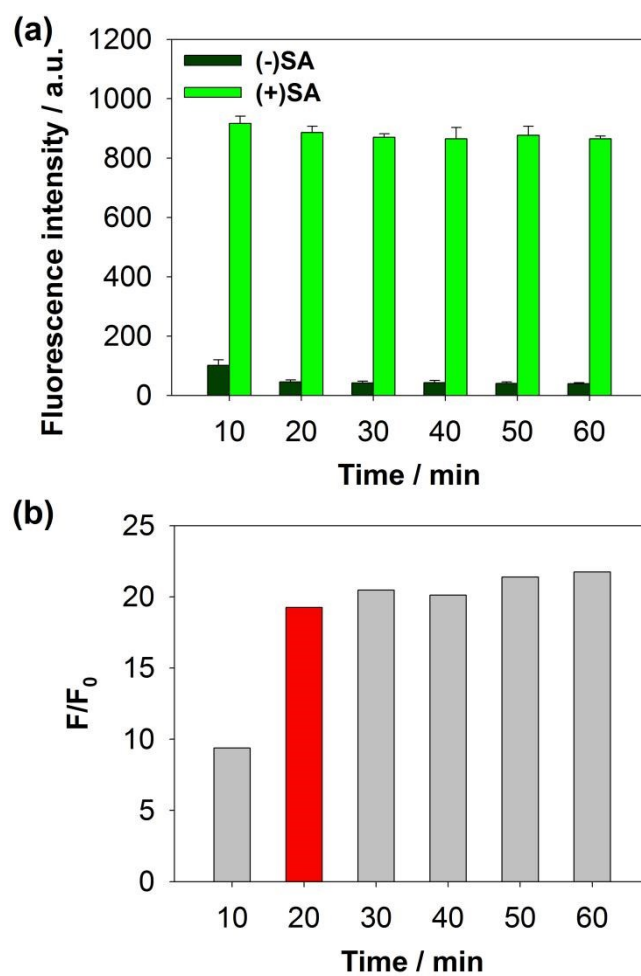

**Fig. S5** (a) Fluorescence spectra of the detection system under different enzymatic reaction time. (b) The effect of reaction time on the detection performance by the manner of signal-to-background ( $F/F_0$ ), where  $F$  is the fluorescence intensity of the detection system in the presence of SA and  $F_0$  is that in the absence of SA.

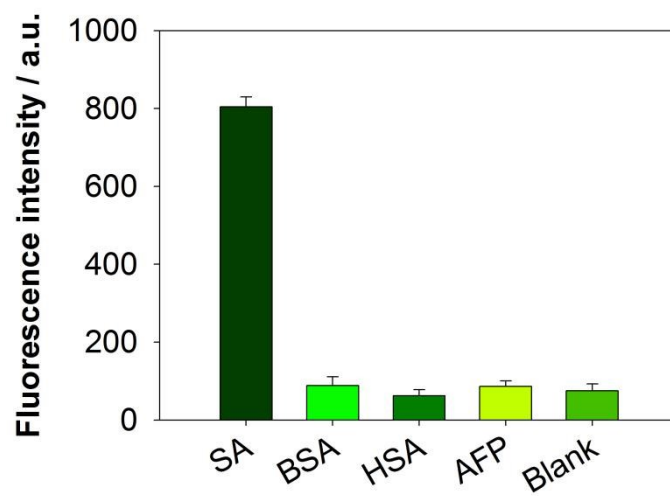

**Fig. S6** Selectivity of the approach for SA detection in serum samples. The final concentration of SA, SA, HSA, and AFP was  $10 \mu\text{g mL}^{-1}$ .
